# Supplementary material for: Complete reconstruction of NiMoO4/NiFe LDH for enhanced oxygen evolution reaction
Source: Royal Society of Chemistry journal article supplement (doi:10.1039/d2cc06879f), 2023-01-01
Supplement: d2cc06879f1.pdf [file d2cc06879f1.pdf]

## Supporting Information

# Complete reconstruction of NiMoO<sub>4</sub>/NiFe LDH for enhanced oxygen evolution reaction

*Shuya Zhang,<sup>a</sup> Mingjun Cen,<sup>a</sup> Qianqiao Wang,<sup>a</sup> Xinyu Luo,<sup>a</sup> Wenchao Peng,<sup>a</sup> Yang Li,<sup>a</sup> Fengbao Zhang,<sup>a</sup> and Xiaobin Fan<sup>\*a,b,c</sup>*

<sup>a</sup> School of Chemical Engineering and Technology, State Key Laboratory of Chemical Engineering, Tianjin University, Tianjin, 300354, China.

<sup>b</sup> Haihe Laboratory of Sustainable Chemical Transformations, Tianjin 300192, China

<sup>c</sup> Institute of Shaoxing, Tianjin University, Zhejiang 312300, China

\* Corresponding authors.

E-mail addresses: [xiaobinfan@tju.edu.cn](mailto:xiaobinfan@tju.edu.cn)

## Experimental section

**Materials.** Ammonium molybdate tetrahydrate  $[(\text{NH}_4)_6\text{Mo}_7\text{O}_{24}\cdot 4\text{H}_2\text{O}]$ , 99%, Aladdin], nickel nitrate hexahydrate  $[\text{Ni}(\text{NO}_3)_2\cdot 6\text{H}_2\text{O}]$ , 98%, Aladdin], ferrous sulfate heptahydrate  $(\text{FeSO}_4\cdot 7\text{H}_2\text{O})$ , AR, Heowns), and urea  $[\text{CO}(\text{NH}_2)_2]$ , 99%, Aladdin]. Deionized water was used to prepare all the aqueous solutions. All these chemicals were utilized without further purification.

**Synthesis of hierarchical  $\text{NiMoO}_4/\text{NiFe}$  LDH.** Firstly,  $\text{NiMoO}_4$  nanorods were grown on nickel foam by hydrothermal method. 0.992g ammonium molybdate tetrahydrate  $[(\text{NH}_4)_6\text{Mo}_7\text{O}_{24}\cdot 4\text{H}_2\text{O}]$  and 0.928g nickel nitrate hexahydrate  $[\text{Ni}(\text{NO}_3)_2\cdot 6\text{H}_2\text{O}]$  were dissolved in 50 mL deionized water under stirring to form a homogeneous solution. The above solution and a piece of pretreated NF (3 cm  $\times$  5 cm) were transferred to a 100 mL Teflon-lined autoclave, sealed, and kept at 150 °C for 6 h. Then, the obtained  $\text{NiMoO}_4$  nanorods were immersed into a mixed solution of nickel nitrate (0.24g), ferrous sulfate (0.08g), urea (0.32g) and kept at 80°C for 30h to construct hierarchical  $\text{NiMoO}_4/\text{NiFe}$  LDH ( $\text{NiMoO}_4/\text{NiFe}$  LDH Fe-25%) pre-catalysts.  $\text{NiMoO}_4/\text{NiFe}$  LDH (Fe-x%, x=50, 70, and 90) was prepared by changing the content of Fe in the mixed solution.

**Synthesis of  $\text{NiMoO}_4$ .**  $\text{NiMoO}_4$  nanorods were grown on nickel foam by hydrothermal. 0.992g ammonium molybdate tetrahydrate  $[(\text{NH}_4)_6\text{Mo}_7\text{O}_{24}\cdot 4\text{H}_2\text{O}]$  and 0.928g nickel nitrate hexahydrate  $[\text{Ni}(\text{NO}_3)_2\cdot 6\text{H}_2\text{O}]$  were dissolved in 50 mL deionized water under stirring to form a homogeneous solution. The above solution and a piece of pretreated NF (3 cm  $\times$  5 cm) were transferred to a 100 mL Teflon-lined autoclave, sealed, and kept at 150 °C for 6 h.

**Synthesis of  $\text{NiFe}$  LDH.** A piece of pretreated NF (3 cm  $\times$  5 cm) was immersed into a mixed solution of nickel nitrate (0.24g) and ferrous sulfate (0.08g), urea (0.32g) and kept at 80°C for 30h. Then, the as-prepared sample was washed with deionized water.

**Characterizations.** The morphologies of samples were characterized by field scanning electron microscopy (SEM, S4800, HITACHI). High-resolution electron transmission images and energy dispersive spectroscopy (EDS) were obtained by a JEM-F200

Microscope. The crystal structure of samples was detected by an X-ray diffraction spectrometer (XDR, Bruker AXS D8 Focus). The chemical composition was detected by inductive couple plasma-optical spectroscopy (ICP-OES, Thermo ICAP PRO) and X-ray photoelectron spectroscopy (XPS, Thermo Fischer, ESCALAB 250Xi). In-situ Raman measurements were performed on a confocal microscopic system (LabRAM HR Evolution, Horiba, France) equipped with a semiconductor laser ( $\lambda = 532$  nm, Laser Quantum Ltd.). The Raman spectra were collected continuously with a step of 0.05 or 0.1 mV during chronoamperometry measurement.

**Electrochemical measurements.** All the electrochemical measurements were performed on CHI-760E with a standard three-electrode system in 1M KOH. The prepared catalyst-loaded nickel foams (NF) were directly utilized as the working electrode. The reference electrode and counter electrode were Ag/AgCl electrode using saturated KCl solution as salt bridging, and carbon rod, respectively. All potentials were converted into reversible hydrogen electrode values (vs. RHE) according to the equation:  $E_{\text{RHE}} = E_{\text{Ag/AgCl}} + 0.197 + 0.059 \times \text{pH}$ . Before recording, the working electrode was scanned for 50 cycles at the scan rate of 50 mV/s without *IR* compensation in 1.0 M KOH solution. Linear sweep voltammetry (LSV) was performed to evaluate OER activity at a scan rate of 1.0 mV/s. Electrochemical impedance spectra (EIS) were obtained in the range of 0.1 Hz-100 kHz with an amplitude of 5 mV at 1.51V. The electrochemically active surface was estimated by measuring the double-layer capacitance ( $C_{dl}$ ) in the non-faradaic region at different scan rates with cyclic voltammetry. The selected potential window and scan rate ranges were 0.9-1.0 V and 20-120mV/s, respectively. The long-term stability of catalysts was evaluated by chronopotentiometry measurement.

**TOF calculation.** The turnover frequency (TOF) of the pre-active site is based on the following equations:

$$n = \frac{Q}{4F} \quad (1)$$

Where  $n$  is the number of active sites estimated in pH=7 phosphate buffer at a scan rate of 50 mV/s,  $Q$  is the number of voltametric charges calculated by integrating CV

curves, and  $F$  is the Faraday constant ( $96485 \text{ C mol}^{-1}$ ).

$$TOF = \frac{j * A}{4 * F * n} \quad (2)$$

Where  $j$  is current density,  $A$  is the geometric area of the working electrode. Note that the physical unit of  $j*A$  is ampere.

FE calculation. The faraday efficiency was calculation by the following equation:

$$FE = \frac{V_{exp.}}{V_{the.}} = \frac{V_{exp.}}{\frac{V_m Q}{4F}} \quad (3)$$

Where  $V_{exp.}$  is the measured volume of generated  $O_2$  (mL),  $V_{the.}$  is the theoretical volume of  $O_2$  (mL),  $Q$  is the electric charges (C),  $V_m$  is the molar volume of gas (24.5 L/mol), and full-cell water splitting was performed in an H-type cell with a proton exchange membrane.

**DFT calculation.** In this work, DFT calculations were performed by Vienna Ab initio Simulation Package (VASP) with the projector augmented wave (PAW) method. The exchange-related function utilized was Perdew-Burke-Ernzerhof (PBE). The cut-off energy specified by ENCUT was set to 500 eV for cell optimization and calculation of the electronic structure. The modeling was performed with a vacuum spacing of at least  $15 \text{ \AA}$  in the direction of the vertical catalyst surface to prevent interference. Taking into account the large structural model, the Brillouin zone integration was performed using  $5 \times 5 \times 1$  Monkhorst-Pack k-point sampling for primitive cells. To improve the calculation accuracy, the value of parameter EDIFF was set to  $10^{-5}$  eV. The relaxation was stopped when the norms of all the forces are smaller than  $0.02 \text{ eV/\AA}$ .

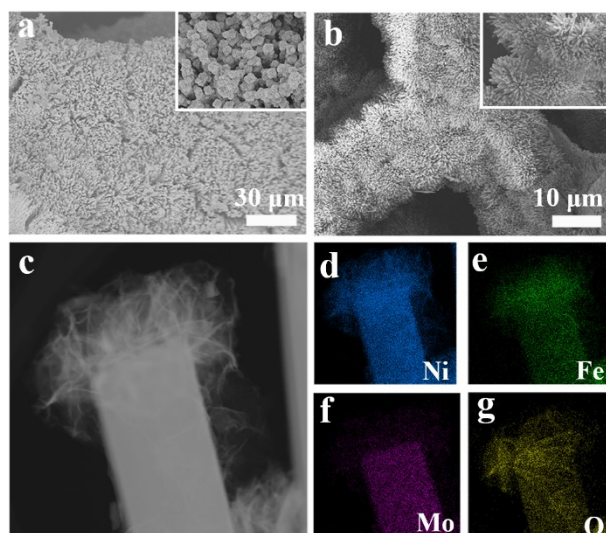

**Fig. S1.** (a) SEM image of NiMoO<sub>4</sub>/NiFe LDH. (b) SEM images of NiMoO<sub>4</sub>. (c) TEM image of NiMoO<sub>4</sub>/NiFe LDH. (d)-(g) EDS mapping of NiMoO<sub>4</sub>/NiFe LDH.

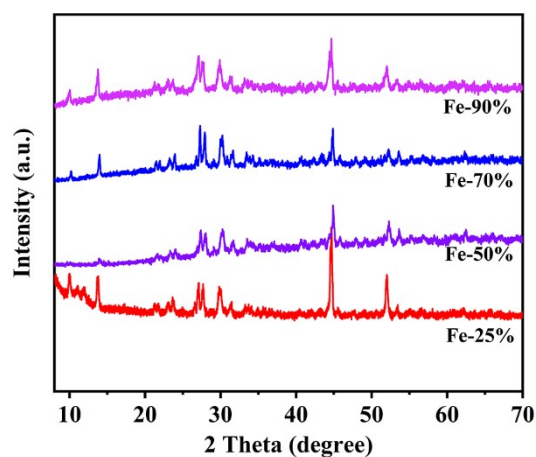

**Fig. S2.** XRD patterns of NiMoO<sub>4</sub>/NiFe LDH with different Fe content.

The XRD patterns of hybridized NiMoO<sub>4</sub>/NiFe LDH with different Fe content show that the variable content of Fe influences the crystal structure of Ni(OH)<sub>2</sub>, but has a negligible influence on the structure of NiMoO<sub>4</sub>. Note that NiMoO<sub>4</sub>/NiFe LDH (Fe-25%) has a better crystal structure.

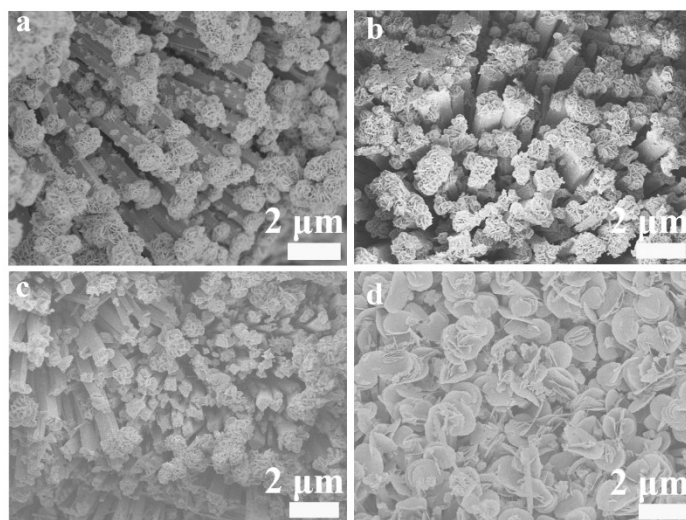

**Fig. S3.** SEM images of NiMoO<sub>4</sub>/NiFe LDH with different Fe content. (a) Fe-25%. (b) Fe-50%. (c) Fe-70%. (d) Fe-90%.

The SEM images of hybridized NiMoO<sub>4</sub>/NiFe LDH with different Fe content show that the content of Fe has a significant influence on the hierarchical structure of catalysts. We find that NiMoO<sub>4</sub>/NiFe LDH (Fe-25%) exhibits a better hierarchical structure than other samples.

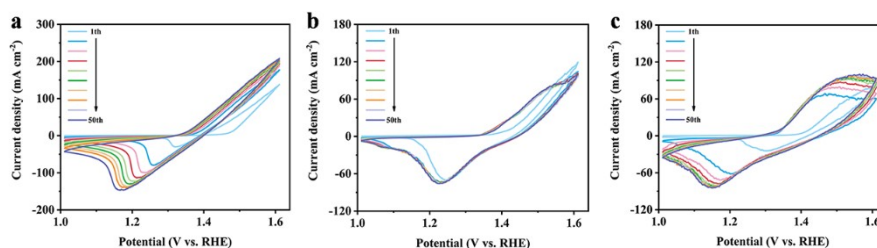

**Fig. S4.** The evolution of CV curves at the scan of 50 mV/s. (a) NiMoO<sub>4</sub>/NiFe LDH. (b) NiFe LDH. (c) NiMoO<sub>4</sub>.

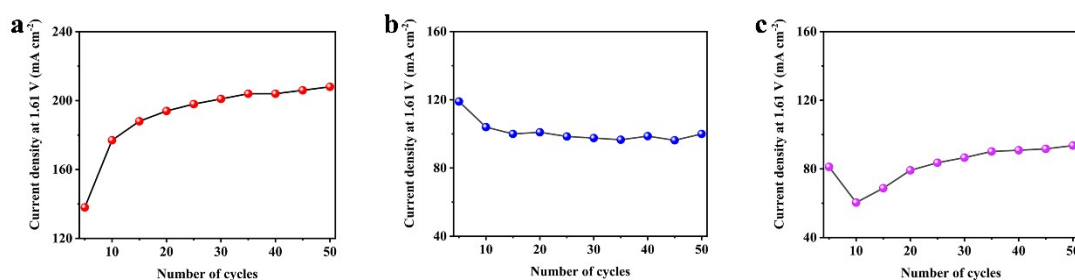

**Fig. S5.** The cut-off current density at 1.61 V vs. RHE. (a) NiMoO<sub>4</sub>/NiFe LDH. (b) NiFe LDH. (c) NiMoO<sub>4</sub>.

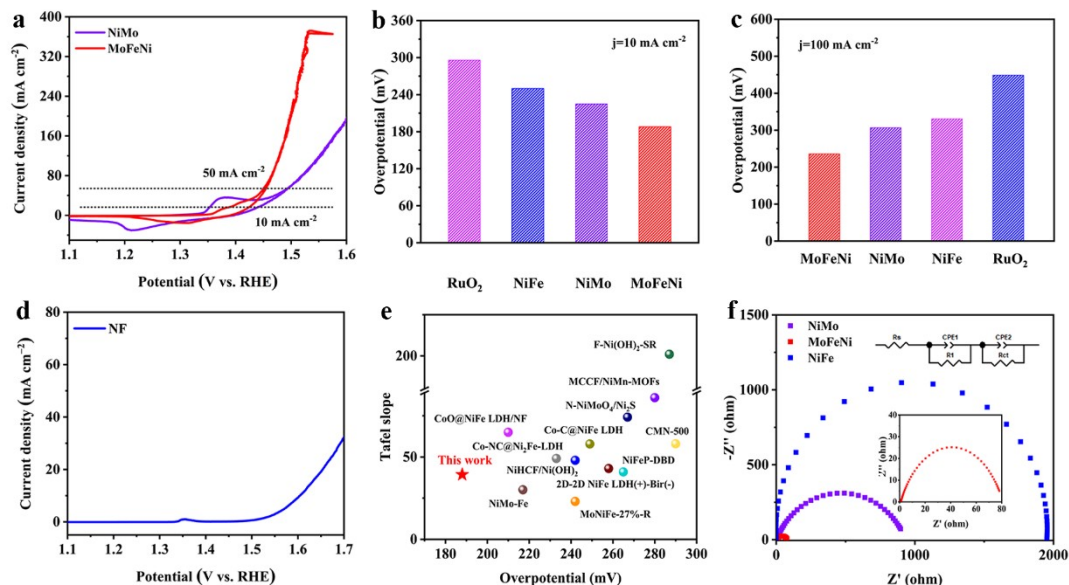

**Fig. S6.** (a) Cyclic voltammetry polarization curves. (b) and (c) Overpotentials at 10 and 100 mA cm<sup>-2</sup>, respectively. (d) LSV curve for NF. (e) Comparison of overpotentials and Tafel slopes at 10 mA cm<sup>-2</sup> for currently reported transition metal OER electrocatalysts. (f) Electrochemical impedance spectra of MoFeNi, NiFe, and NiMo.

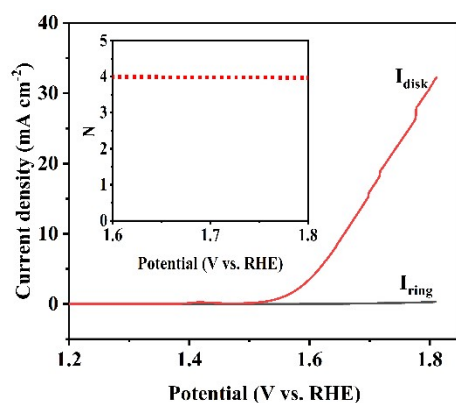

**Fig. S7.** RRDE voltammogram and the calculated  $N$  for MoFeNi. As shown in Fig. S7, the ring current ( $I_{ring}$ ) is negligible in the 1.6-1.8 V range compared to the disk current ( $I_{disk}$ ). Moreover, the average electron numbers calculated from RRDE measurement show that experimental OER is consistent with the theoretical 4-electron process.

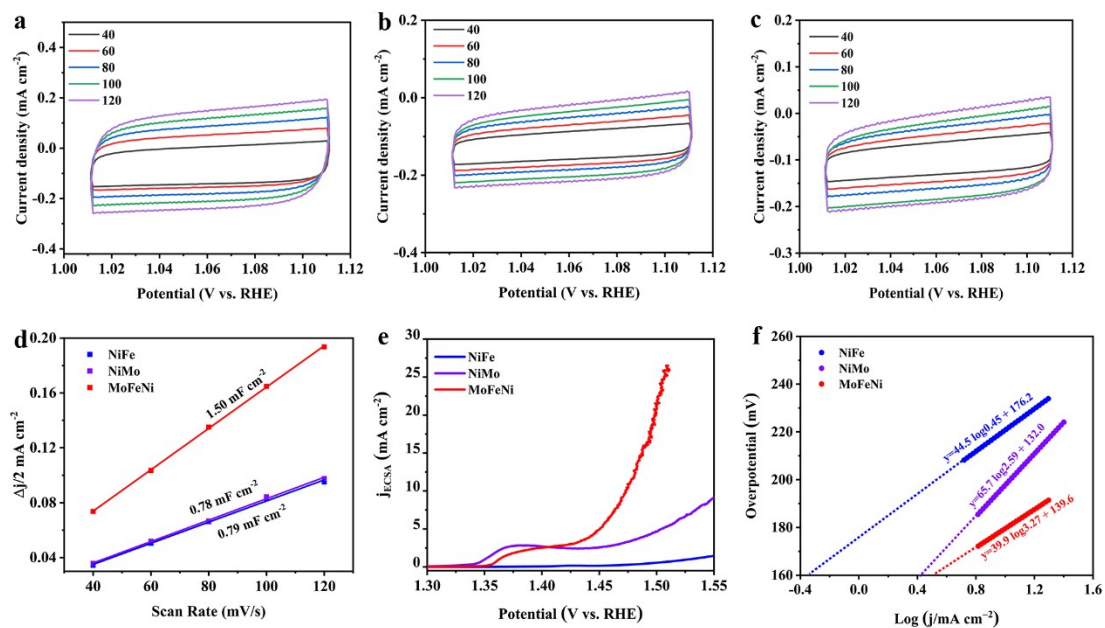

**Fig. S8.** (a), (b), and (c) CV curves at different scan rates of MoFeNi, NiMo, and NiFe, respectively. (d) Current density versus scan rate profiles for estimating  $C_{dl}$ . (e) Current density normalized by ECSA. (f) Exchange current density of NiFe, NiMo, and MoFeNi.

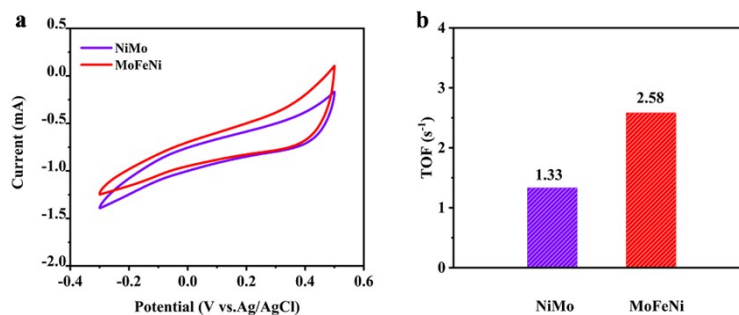

**Fig. S9.** (a) CV curves of NiMo and MoFeNi in pH=7 phosphate buffer. (b) Turnover frequencies of catalysts at the overpotential of 280 mV in 1.0 M KOH.



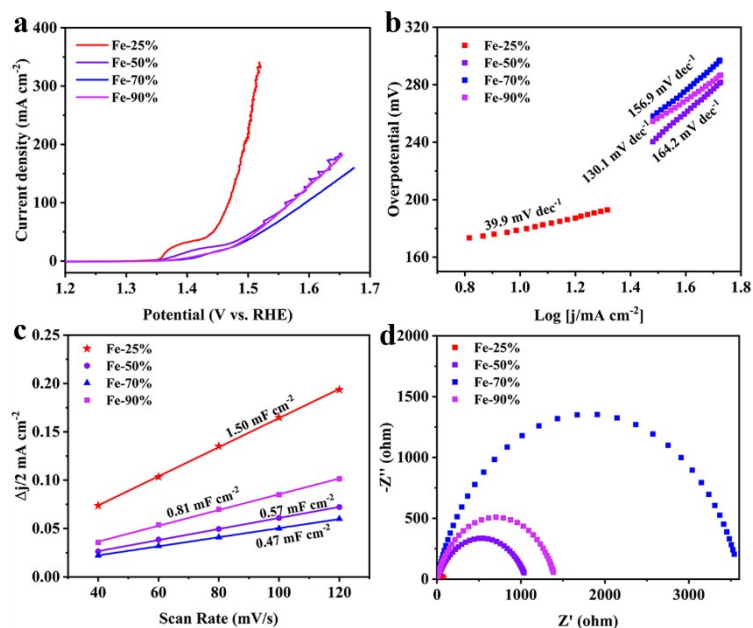

**Fig. S10.** OER performance for NiMoO<sub>4</sub>/NiFe LDH with different Fe content. (a) LSV curves. (b) Tafel plots. (c) Current density versus scan rate profiles for estimating  $C_{dl}$ . (d) EIS curves.

We evaluated the OER performance of NiMoO<sub>4</sub>/NiFe LDH with different Fe content after complete reconstruction. As shown in Fig. S10a and b, NiMoO<sub>4</sub>/NiFe LDH(Fe-25%) exhibits the lowest overpotential and Tafel slope, suggesting better OER activity and faster electrochemical kinetic. Furthermore, NiMoO<sub>4</sub>/NiFe LDH(Fe-25%) holds more ECSA and a faster charge transfer rate, which may be attributed to a well-hierarchical structure and effective adjustment of electronic structure (Fig. S10c and d). Therefore, NiMoO<sub>4</sub>/NiFe LDH (Fe-25%) is selected for analyzing complete reconstruction behavior.

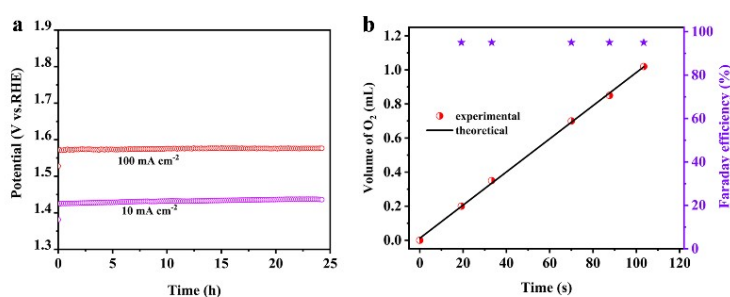

**Fig. S11.** (a) Chronopotentiometry curves at the current density of 10 and 100 mA cm<sup>-2</sup>. (b) Experimental and theoretical volumes of O<sub>2</sub> and Faraday efficiency.

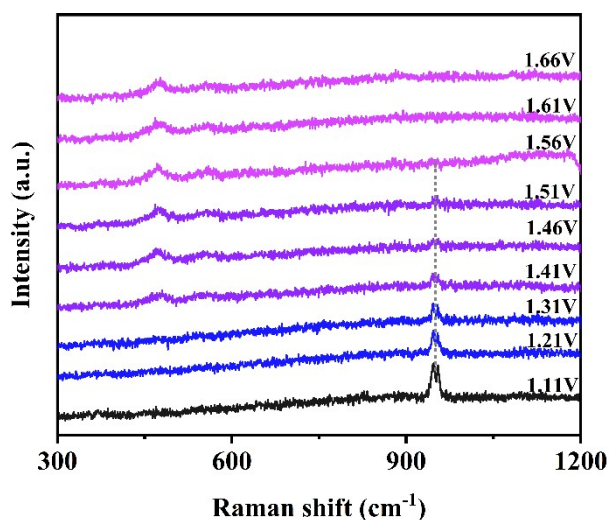

**Fig. S12.** *In-situ* Raman spectra of NiMoO<sub>4</sub>.

As shown in Fig. S12, Mo–O vibration at 948 cm<sup>-1</sup> disappears until the anode potential reached 1.56 V, which is higher than that of NiMoO<sub>4</sub>/NiFe LDH. This result suggests that NiMoO<sub>4</sub>/NiFe LDH is more favorable for the selective etching of MoO<sub>4</sub><sup>2-</sup> and achieving faster phase transformation during complete reconstruction.

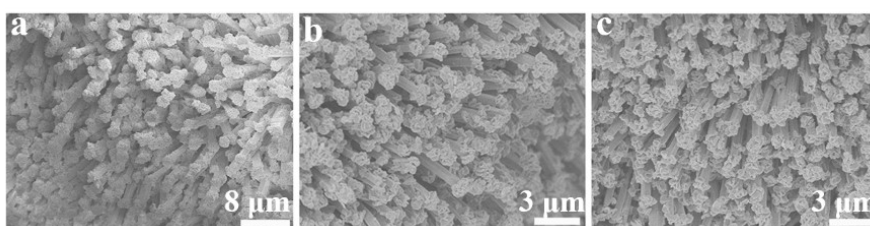

**Fig. S13.** SEM images of NiMoO<sub>4</sub>/NiFe LDH that underwent the *in-situ* Raman process. (a) 1.11 V. (b) 1.51 V. (c) 1.66 V.

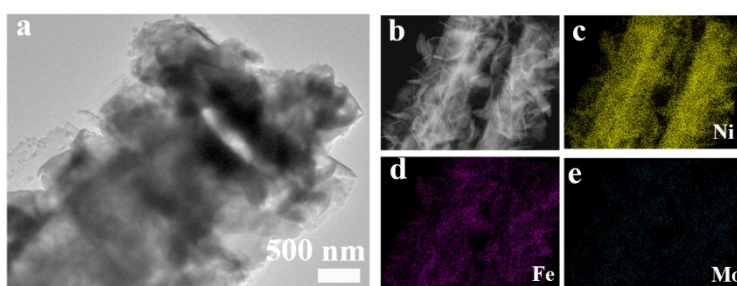

**Fig. S14.** (a) Low magnification TEM of MoFeNi. (b)-(e) EDS mapping of MoFeNi.

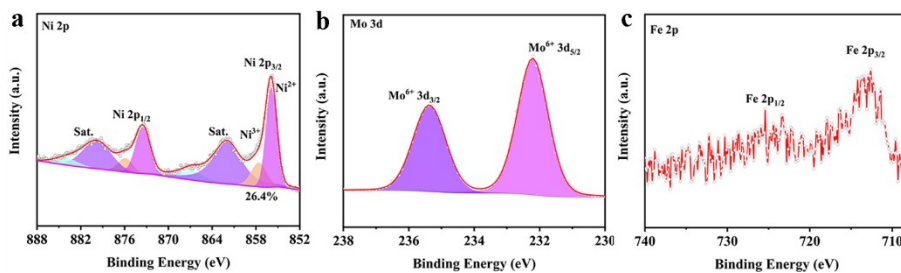

**Fig. S15.** XPS spectra of NiMoO<sub>4</sub>/NiFe-LDH pre-catalyst (a) Ni 2p. (b) Mo 3d. (c) Fe 2p. As shown in Fig. S15a, the peaks located at 855.9 eV and 857.6 eV are attributed to Ni<sup>2+</sup> 2p<sub>3/2</sub> and Ni<sup>3+</sup> 2p<sub>3/2</sub> in NiMoO<sub>4</sub>/NiFe-LDH pre-catalyst, respectively.<sup>1,2</sup> The content of Ni<sup>3+</sup> species in NiMoO<sub>4</sub>/NiFe-LDH pre-catalyst before reconstruction is calculated to be 26.4%. The high-resolution XPS of Mo 3d is shown in Fig. 15b. The two peaks at 232.2 eV and 235.4 eV are ascribed to Mo<sup>6+</sup> 3d<sub>5/2</sub> and Mo<sup>6+</sup> 3d<sub>3/2</sub>, respectively.<sup>3</sup> Besides, the Fe 2p XPS is displayed in Fig. 15c. The peak at 713.3 eV is derived from Fe<sup>3+</sup> 2p<sub>3/2</sub> in NiMoO<sub>4</sub>/NiFe-LDH pre-catalyst.<sup>4</sup> The XPS results of the NiMoO<sub>4</sub>/NiFe-LDH pre-catalyst suggest that the oxidative states of Ni, Mo, and Fe species are mainly Ni<sup>2+</sup>, Mo<sup>6+</sup>, and Fe<sup>3+</sup>, respectively.

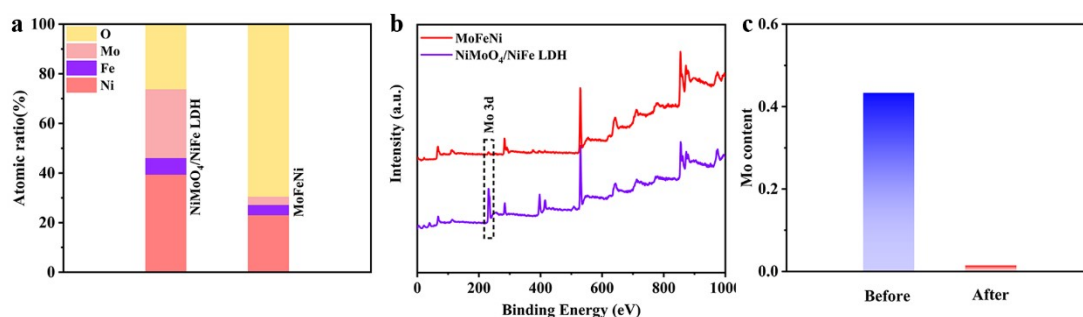

**Fig. S16.** (a) Element composition changes of samples before and after reconstruction measured by EDS. (b) XPS spectra of NiMoO<sub>4</sub>/NiFe LDH before and after reconstruction. (c). Mo content in the sample before and after reconstruction.

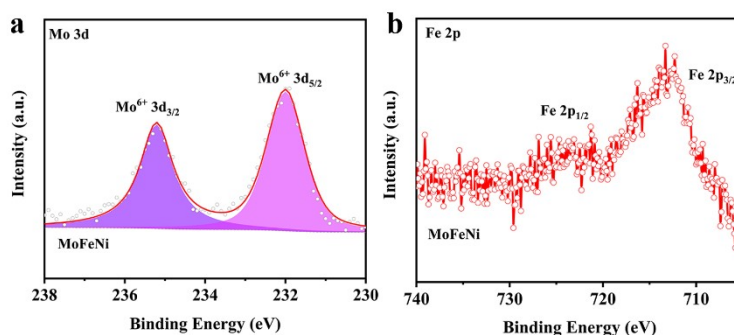

**Fig. S17.** XPS spectra for MoFeNi. (a) Mo 3d. (b). Fe 2p.

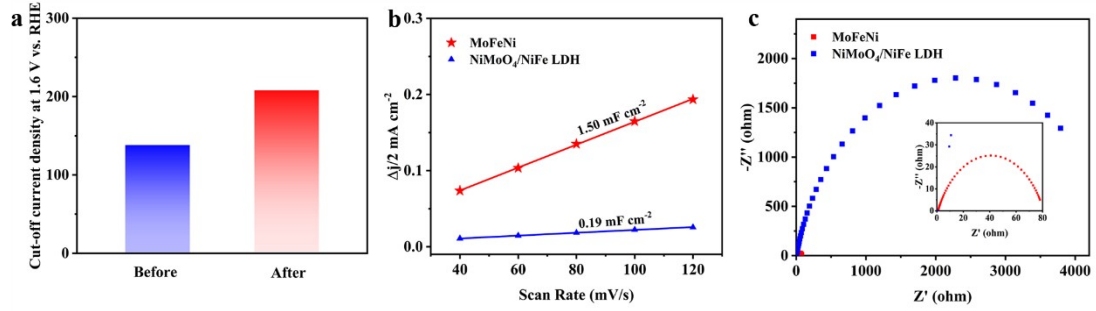

**Fig. S18.** Electrochemical tests of NiMoO<sub>4</sub>/NiFe LDH before and after complete reconstruction. (a) cut-off current density. (b) Current density versus scan rate profiles for estimating  $C_{dl}$ . (c) EIS curves.

To further demonstrate the positive effect of complete reconstruction, we analyzed the electrochemical data before and after reconstruction. As shown in Fig. S18a, the cut-off current density increases from 138 to 208 mA cm<sup>-2</sup> at 1.6 V (without IR compensation). Afterward, the  $C_{dl}$  value before and after complete reconstruction is calculated to be 0.19 and 1.50 mF cm<sup>-2</sup>, indicating that the sample has a larger ECSA after reconstruction (Fig. S18b). Besides, the sample after reconstruction has the smallest  $R_{ct}$  value, suggesting reconstruction facilitates the faster charge transfer (Fig. S18c). These results elucidate that the complete reconstruction has a positive effect on the OER process of NiMoO<sub>4</sub>/NiFe LDH pre-catalyst.

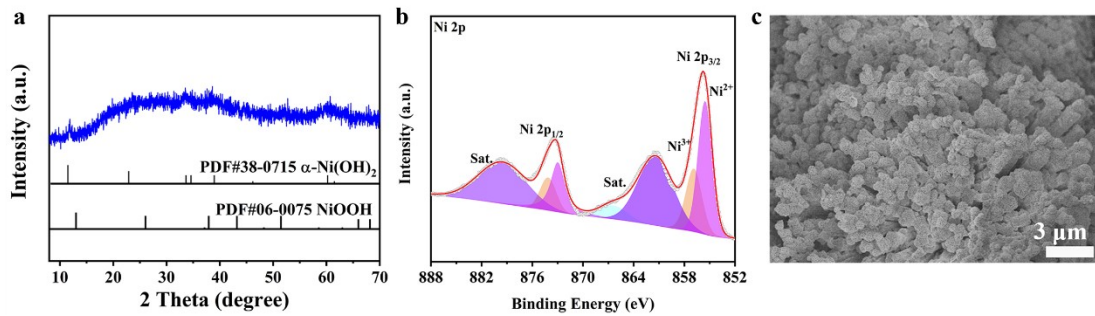

**Fig. S19.** The structural and morphological characterization of MoFeNi after 48 h OER. (a) XRD pattern. (b). Ni 2p XPS. (c) SEM image.

As shown in Fig. S19, we characterized the structure and morphology of MoFeNi after 48 h OER. The XRD pattern shows that Ni(OH)<sub>2</sub> and NiOOH phases can be well preserved (Fig. S19a). This result is consistent with the presence of abundant Ni<sup>3+</sup> (Fig. S19b). Besides, the SEM image of MoFeNi after 48 h OER is shown in Fig. S19c and hierarchical morphology can be observed. These results indicate MoFeNi possesses pretty structural and morphological stability.

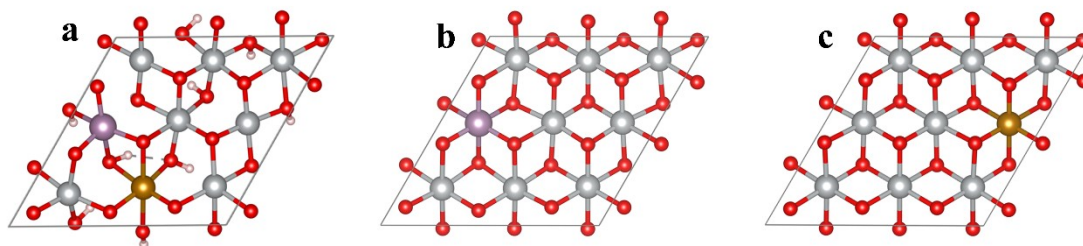

**Figure S20.** Structure models for DFT calculations. (a) MoFeNi. (b) NiMo. (c) NiFe.

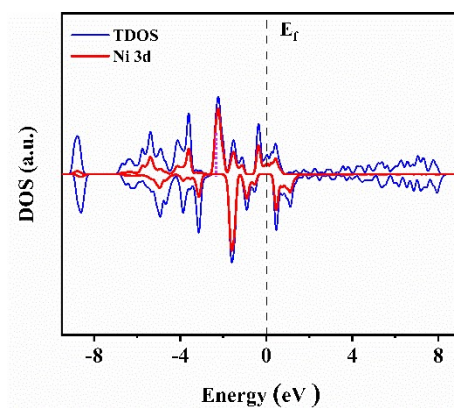

**Fig. S21.** The density of states (DOS) and d-band center level of Ni 3d orbitals in NiOOH.

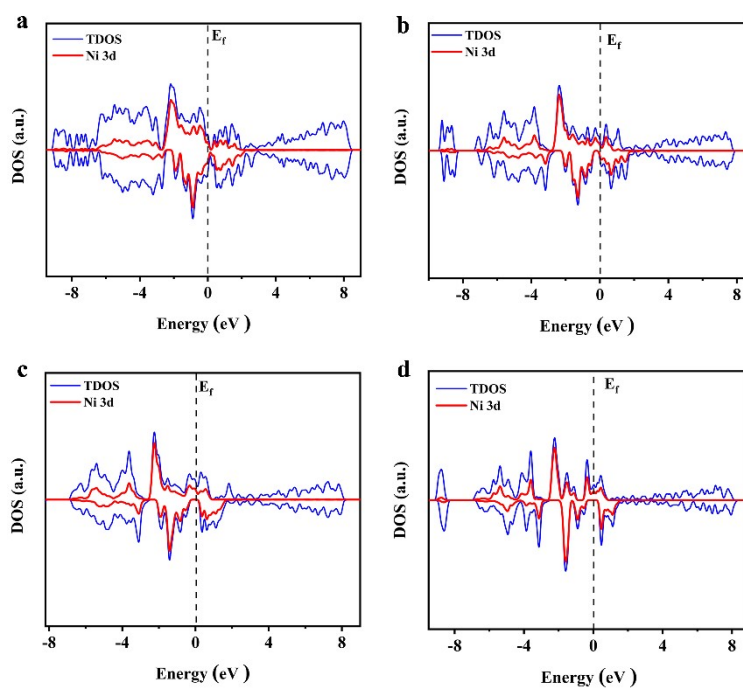

**Fig. S22.** The total density of state (TDOS, blue) and projected density of state (PDOS, red) of Ni 3d orbitals for MoFeNi, NiMo, and NiFe.

**Table S1.** The overpotential and Tafel slope comparison between our work and other reported Ni-based electrocatalysts.

| electrocatalysts                         | electrolyte | Overpotential (mV)<br>at 10 mA cm <sup>-2</sup> | Tafel slop | Ref.      |
|------------------------------------------|-------------|-------------------------------------------------|------------|-----------|
| MoFe -Ni (oxy)hydroxide                  | 1.0 M KOH   | 188                                             | 39.9       | This work |
| CMN-500                                  | 1.0 M KOH   | 290                                             | 58.0       | 5         |
| F-Ni(OH) <sub>2</sub> -SR                | 1.0 M KOH   | 287                                             | 201        | 6         |
| MCCF/NiMn-MOFs                           | 1.0 M KOH   | 280                                             | 86         | 7         |
| NiHCF/Ni(OH) <sub>2</sub>                | 1.0 M KOH   | 242                                             | 48         | 8         |
| MoNiFe-27%-R                             | 1.0 M KOH   | 242                                             | 23         | 9         |
| NiFeCoLDH/CF                             | 1.0 M KOH   | 249                                             | 42         | 10        |
| NiFeP-DBD                                | 1.0 M KOH   | 265                                             | 40.9       | 11        |
| NiMo-Fe                                  | 1.0 M KOH   | 217                                             | 30.1       | 3         |
| Co-C@NiFe LDH                            | 1.0 M KOH   | 249                                             | 57.9       | 12        |
| NiFe-MoOx NS                             | 1.0 M KOH   | 276                                             | 56.0       | 13        |
| 2D-2D NiFe LDH(+)-Bir(-)                 | 1.0 M KOH   | 258                                             | 43         | 14        |
| CoO@NiFe LDH/NF                          | 1.0 M KOH   | 210                                             | 65         | 15        |
| S-NiFe (oxy)hydroxide/CNT                | 1.0 M KOH   | 190                                             | \          | 16        |
| N-NiMoO <sub>4</sub> /NiS <sub>2</sub>   | 1.0 M KOH   | 267                                             | 74.2       | 17        |
| Co-NC@Ni <sub>2</sub> Fe-LDH             | 1.0 M KOH   | 233                                             | 49.1       | 18        |
| Ni(Fe)OOH-Fe <sub>2</sub> O <sub>3</sub> | 1.0 M KOH   | 230                                             | 41         | 19        |

**Table S2.** The overpotentials at 50 mA cm<sup>-2</sup> for different catalysts.

| catalysts                                    | MoFeNi | NiMo | NiFe |
|----------------------------------------------|--------|------|------|
| Overpotential (mV) at 50 mA cm <sup>-2</sup> | 210    | 258  | 289  |

**Table S3.** The metal content in the KOH electrolyte.

| elements              | Mo       | Fe   | Ni    |
|-----------------------|----------|------|-------|
| loading amount (μg/L) | 789917.9 | 28.2 | 457.4 |

**Table S4.** The d-band center level for Ni 3d orbitals of different structures.

| Structures               | MoFeNi | NiMo  | NiFe  | NiOOH |
|--------------------------|--------|-------|-------|-------|
| d-band center level (eV) | -2.07  | -2.60 | -2.35 | -2.37 |

## References

- 1 J. Lv, L. Wang, R. Li, K. Zhang, D. Zhao, Y. Li, X. Li, X. Huang and G. Wang, *ACS Catal.*, 2021, **11**, 14338-14351.
- 2 N. Zhang, X. Feng, D. Rao, X. Deng, L. Cai, B. Qiu, R. Long, Y. Xiong, Y. Lu and Y. Chai, *Nat. Commun.*, 2020, **11**, 4066.
- 3 H. Liao, X. Zhang, S. Niu, P. Tan, K. Chen, Y. Liu, G. Wang, M. Liu and J. Pan, *Appl. Catal. B: Environ.*, 2022, **307**, 121150.
- 4 J. Ge, J. Y. Zheng, J. Zhang, S. Jiang, L. Zhang, H. Wan, L. Wang, W. Ma, Z. Zhou and R. Ma, *J. Mater. Chem. A*, 2021, **9**, 14432-14443.
- 5 J. Bai, J. Mei, T. Liao, Q. Sun, Z. G. Chen and Z. Sun, *Adv. Energy Mater.*, 2021, **12**, 2103247.
- 6 Y. Kang, S. Wang, K. S. Hui, S. Wu, D. A. Dinh, X. Fan, F. Bin, F. Chen, J. Geng, W.-C. M. Cheong and K. N. Hui, *Nano Res.*, 2021, **15**, 2952-2960.
- 7 W. Cheng, X. F. Lu, D. Luan and X. W. Lou, 2022, **59**, 18234–18239.
- 8 W. Hua, H. Sun, M. Jiang, L. Ren, Y. Zhang and J.-G. Wang, *J. Mater. Chem. A*, 2022, **10**, 7366-7372.
- 9 Z. He, J. Zhang, Z. Gong, H. Lei, D. Zhou, N. Zhang, W. Mai, S. Zhao and Y. Chen, *Nat. Commun.*, 2022, **13**, 2191.
- 10 Y. Lin, H. Wang, C. K. Peng, L. Bu, C. L. Chiang, K. Tian, Y. Zhao, J. Zhao, Y. G. Lin, J. M. Lee and L. Gao, *Small*, 2020, **16**, 2002426.
- 11 T. Wang, X.-Z. Fu and S. Wang, *Green Energy Environ.*, 2022, **7**, 365-371.
- 12 W. Li, S. Chen, M. Zhong, C. Wang and X. Lu, *Chem. Eng. J.*, 2021, **415**, 128879.
- 13 C. Xie, Y. Wang, K. Hu, L. Tao, X. Huang, J. Huo and S. Wang, *J. Mater. Chem. A*, 2017, **5**, 87-91.
- 14 X. Long, Z. Chen, M. Ju, M. Sun, L. Jin, R. Cai, Z. Wang, L. Dong, L. Peng, B. Huang and S. Yang, *Angew. Chem. Int. Ed.*, 2021, **60**, 9699-9705.
- 15 Z. Wang, J. Zhang, Q. Yu, H. Yang, X. Chen, X. Yuan, K. Huang and X. Xiong, *Chem. Eng. J.*, 2021, **410**, 128366.
- 16 T. Wang, G. Nam, Y. Jin, X. Wang, P. Ren, M. G. Kim, J. Liang, X. Wen, H. Jang, J. Han, Y. Huang, Q. Li and J. Cho, *Adv. Mater.*, 2018, **30**, 1800757.
- 17 L. An, J. Feng, Y. Zhang, R. Wang, H. Liu, G.-C. Wang, F. Cheng and P. Xi, *Adv. Funct. Mater.*, 2019, **29**, 1805298.
- 18 T. Guo, L. Chen, Y. Li and K. Shen, *Small*, 2022, **18**, 2107739.
- 19 H. Yang, C. Dong, H. Wang, R. Qi, L. Gong, Y. Lu, C. He, S. Chen, B. You, H. Liu, J. Yao, X. Jiang, X. Guo and B. Y. Xia, *Proc. Natl. Acad. Sci. U. S. A.*, 2022, **119**, 2202812119.
